# Supplementary material for: Genotypic Variation under Fe Deficiency Results in Rapid Changes in Protein Expressions and Genes Involved in Fe Metabolism and Antioxidant Mechanisms in Tomato Seedlings (Solanum lycopersicum L.)
Source: MDPI journal article supplement (doi:10.3390/ijms161226086), 2015-11-25
Supplement: s1 [file s1]

# Supplementary Materials: Genotypic Variation under Fe Deficiency Results in Rapid Changes in Protein Expressions and Genes Involved in Fe Metabolism and Antioxidant Mechanisms in Tomato Seedlings (*Solanum lycopersicum* L.)

Sowbiya Muneer and Byoung Ryong Jeong

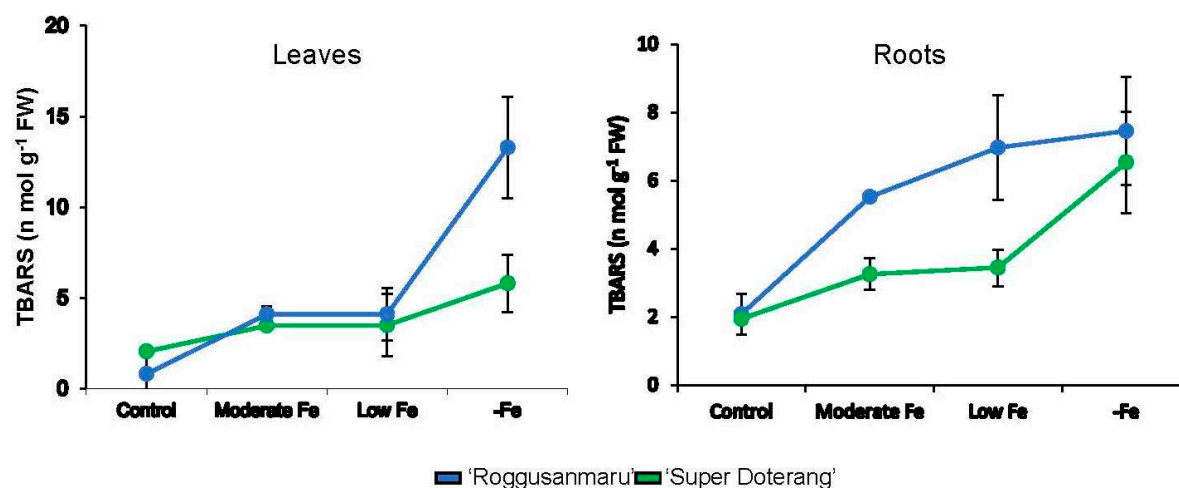

Figure S1. Oxidative damage in the form of thiobarbituric acid reactive substances (TBARS) in “Roggusanmaru” and “SuperDoterang” tomato cultivars. Plants were grown in Fe-sufficient (control); moderate Fe; low Fe; and Fe-deficient (-Fe) hydroponic conditions for 10 days. Color lines represent Mean  $\pm$  SE of four biological replicates.
